# Supplementary material
Source: publisher figshare collection journal article supplement (https://acs.figshare.com/ndownloader/files/4396729)
Supplement: Supplementary file 1 [file 4396729]

Electronic Supplementary Information (ESI) for

Chemoselectivity Diversity in the reaction of  $\text{LiNC}_6\text{F}_5\text{SiMe}_3$  with nitriles, and synthesis, structure and reactivity of zirconium mono and tris-2-(2-pyridyl)tetrafluorobenzimidazolate complexes.

*Sinai Aharonovich, Mark Botoshansky, Robert M. Waymouth, and Moris S. Eisen\**

\*To whom correspondence should be addressed. E-mail: [chmoris@tx.technion.ac.il](mailto:chmoris@tx.technion.ac.il)

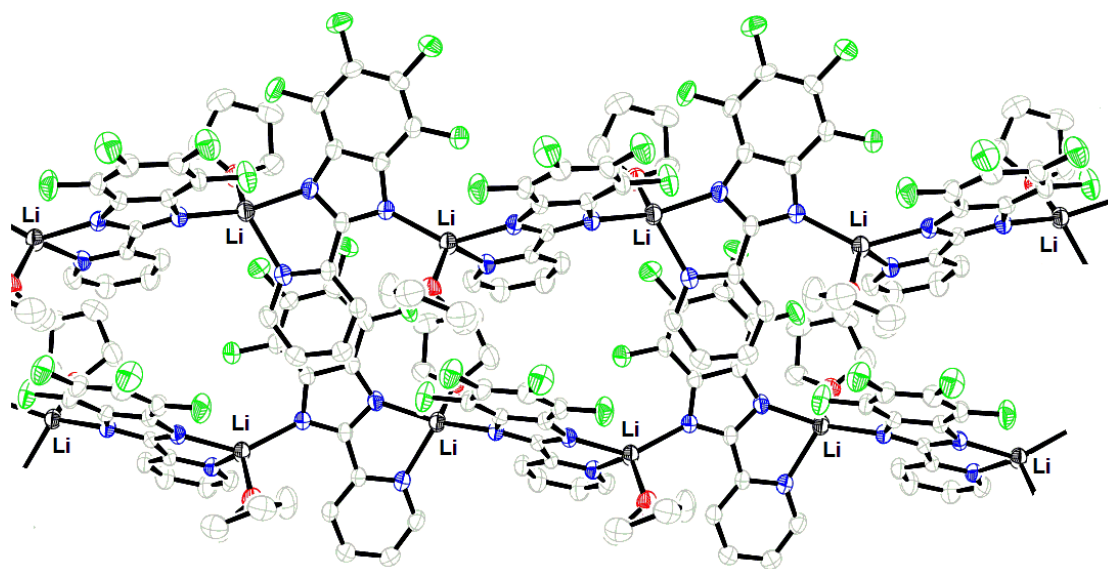

Figure S1: An ORTEP image of the extended structure of polymer **5** (50% thermal ellipsoids). Hydrogen atoms are omitted for clarity.

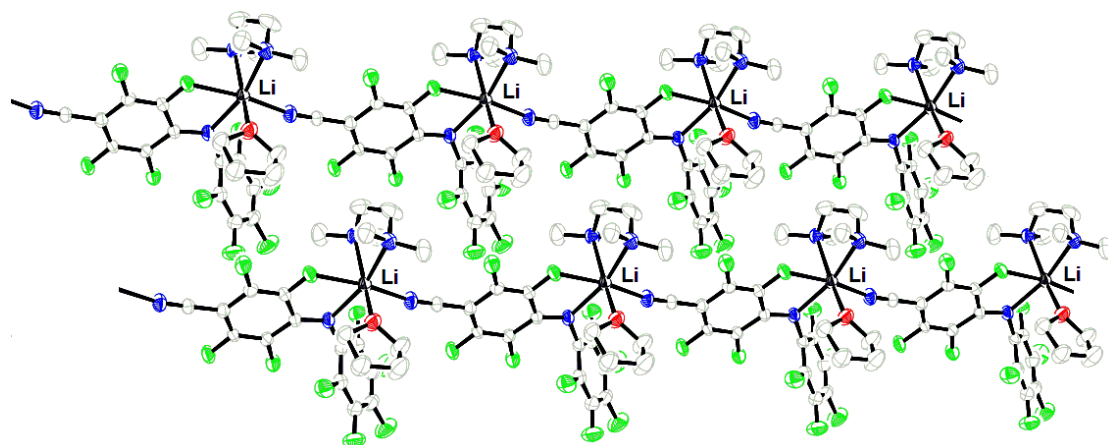

Figure S2: An ORTEP image of the extended structure of polymer **7** (50% thermal ellipsoids). Hydrogen atoms are omitted for clarity.
